# Supplementary material
Source: PubMed Central journal article supplement (PMC3367316)
Supplement: NIHMS370143-supplement-S1.pdf [file NIHMS370143-supplement-S1.pdf]

# ICoMM Technology Group meeting Max Planck Institute of Marine Microbiology, Bremen January 31<sup>st</sup>-February 1<sup>st</sup> 2005

- **Data Water column**
    - a. Contextual information
      - i. Location
      - ii. Latitude, longitude
      - iii. Depth
      - iv. Sampling methodology
      - v. Important parameters
        - Chemical
          - CTD; Conductivity, Temperature and Salinity, pH
        - Physical data
          - Depth
          - GPS
          - Time
          - Light intensity/depth
      - vi. Desirable parameters
        - Fluorescence
          - In situ fluorescence; chlorophyll measurement
          - Variable fluorometry; fluorescence kinetics
        - Quantum yield measurements
        - Oxygen
        - Alkalinity
        - DOC
        - POC
        - Sulphides
        - Suphates
        - Nitrates
        - Phosphates
        - Turbidity to estimate particulate matter
        - Current
        - Atmospheric data
    - b. Biological related data
      - i. Sequences
      - ii. Proteomics
      - iii. Metabolomics
      - iv. Lipidomics staining data; acridine orange staining, propidium iodine
        - Microscopy
        - FACS
      - v. Particular size distributions
      - vi. Quantitative measurements
        - qPCR
        - SARST
        - Specific probes
        - TRFLP
        - FISH
- **Soft sediment data (Part of Benthic systems)**
  - a. Contextual information
    - i. Location
    - ii. Latitude, longitude
    - iii. Depth
    - iv. Sampling methodology
    - v. Important parameters
      - Chemical
        - Oxygen
        - pH
        - H<sub>2</sub>S
        - Porewater chemistry
      - Physical data
        - Depth
        - GPS
        - Time
        - Porosity
        - Grain size distribution
        - Permeability
        - Flows and currents
        - Incident light
        - Temperature
        - Boundary layer characteristics
        - 2 dimensional Imaging data
        - Structural characterization of data
    - vi. Desirable parameters
      - Fluorescence
        - In situ fluorescence; chlorophyll measurement.
        - Variable fluorometry; fluorescence kinetics
      - CO<sub>2</sub>
      - Ca
      - Nitrate, nitrite, ammonia
      - Carbonate
      - Hydrogen
      - H<sub>2</sub>O<sub>2</sub>
      - Sulphides
      - SO<sub>4</sub>
      - Alkalinity
      - DOC
      - POC
      - Phosphates
      - Turbidity to estimate particulate matter.
      - Two dimensional O<sub>2</sub> pH imaging
      - In situ time sampling
  - b. Biological related data
    - i. Sequences
    - ii. Proteomics
    - iii. Metabolomics
    - iv. Lipidomics
    - v. Staining data; acridine orange staining, propidium iodine.
      - Microscopy
        - Sectioning of frozen sediment

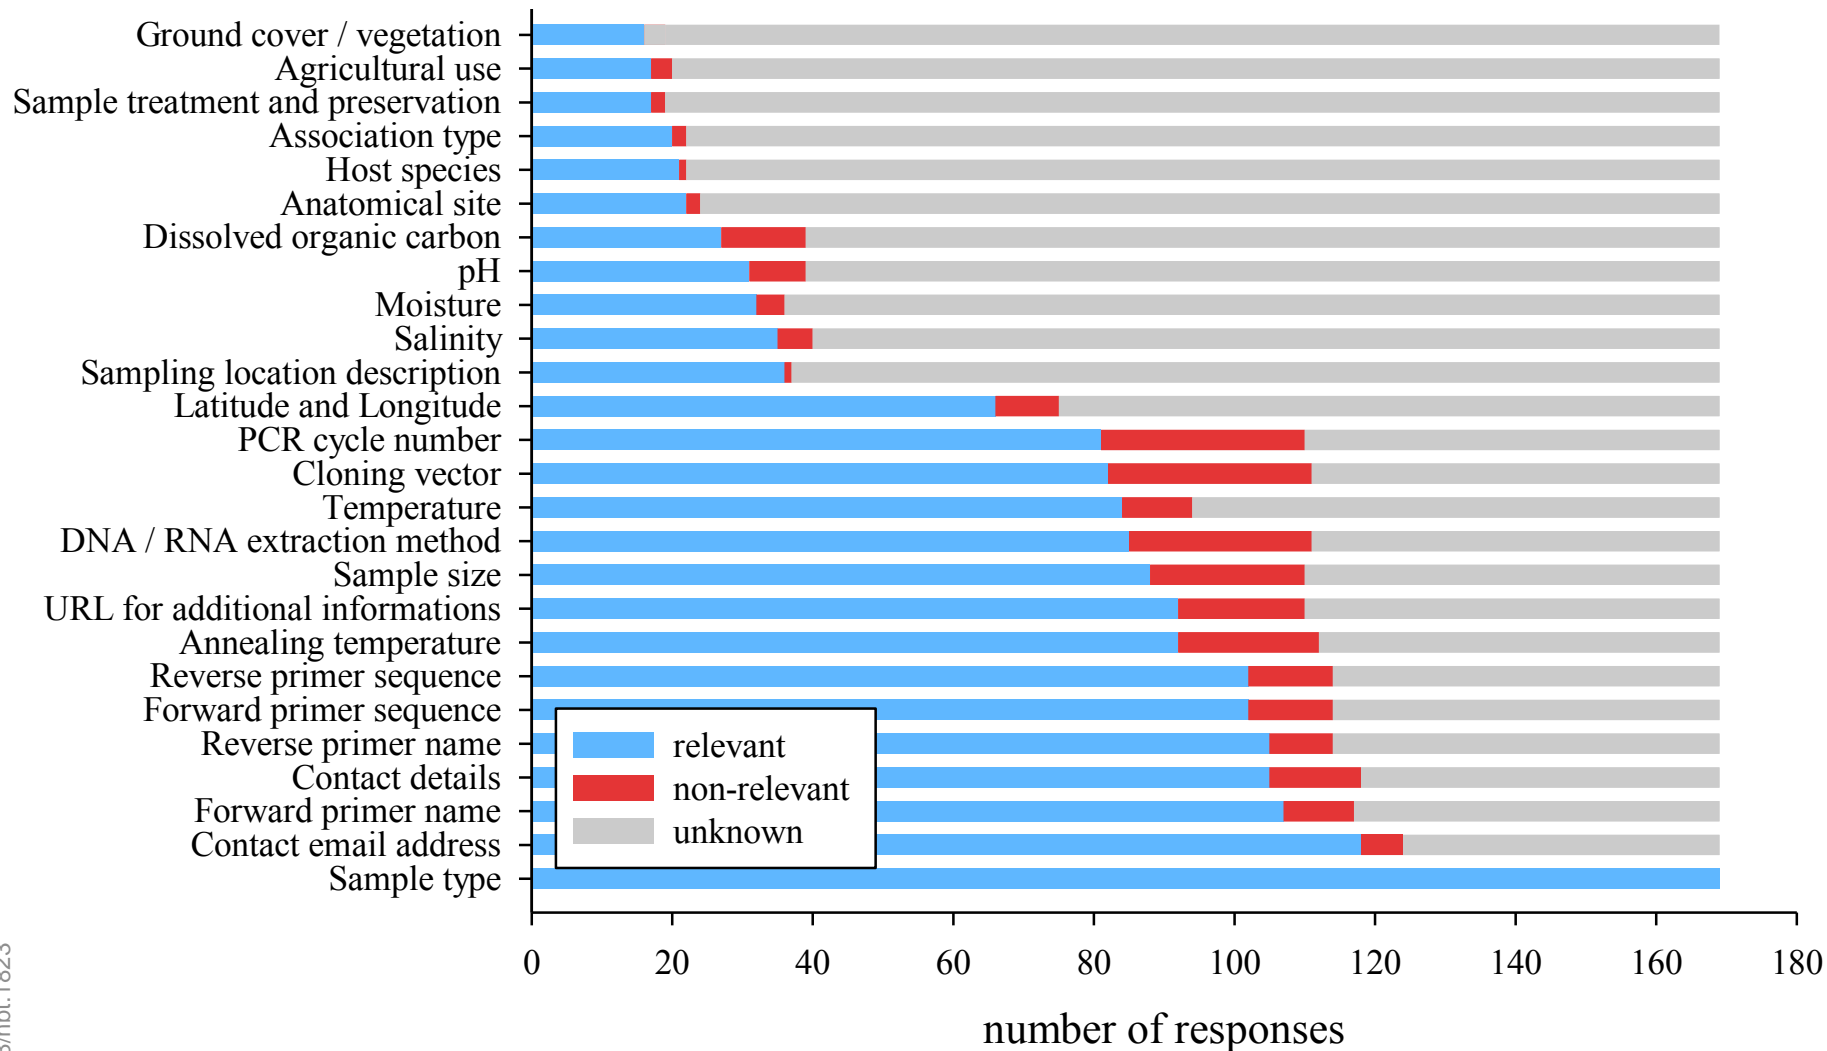

**Figure S2.** JGI metadata survey results. Bars represent the absolute number of relevant (blue), non-relevant (red) and unknown (gray) responses for a given item. The survey ran between May 2005 and August 2005 and 486 responses were obtained from 78 different locations within six months, with a maximum of 169 responses on one data field. The results shown in the diagram for the selected fields are based on a total number of the 169 responses. "Unknown response" was calculated by subtracting the total number of answers for a given data field from the total number of 169.

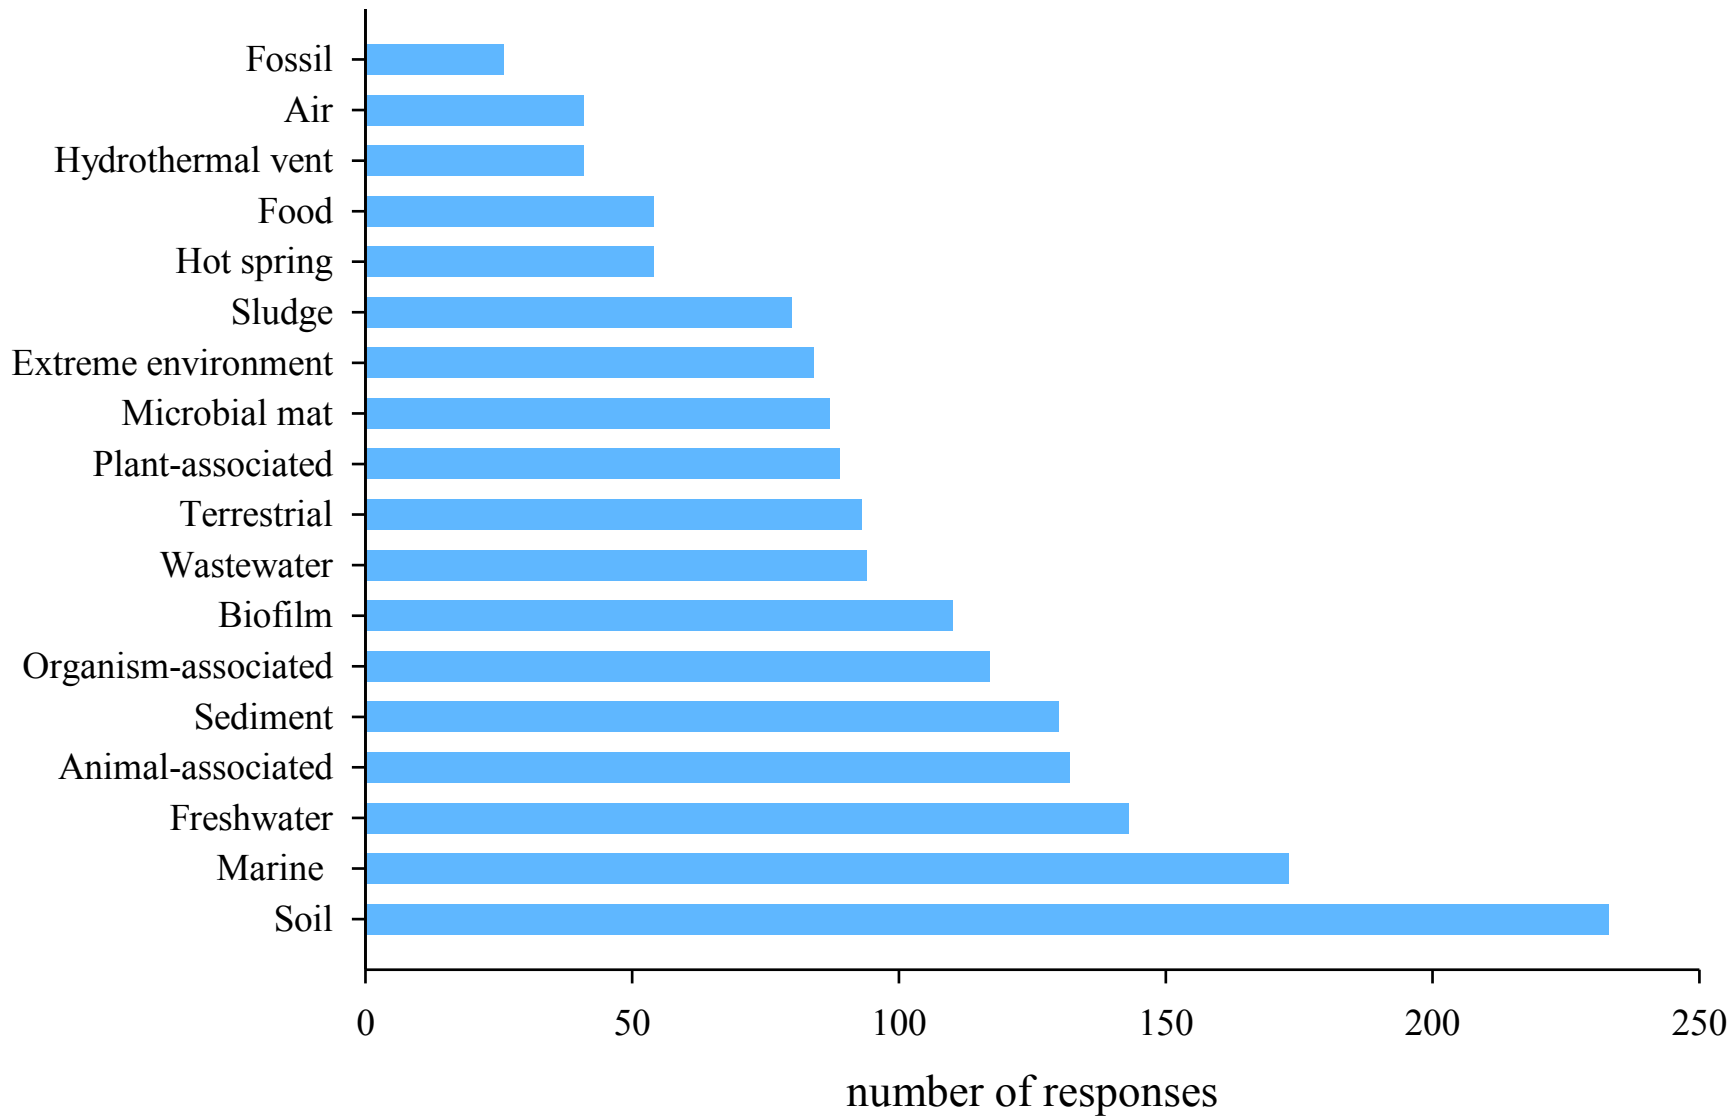

**Figure S3.** RDP user survey #5 for habitat descriptors results. Bars represent the absolute number of responses for a given item.

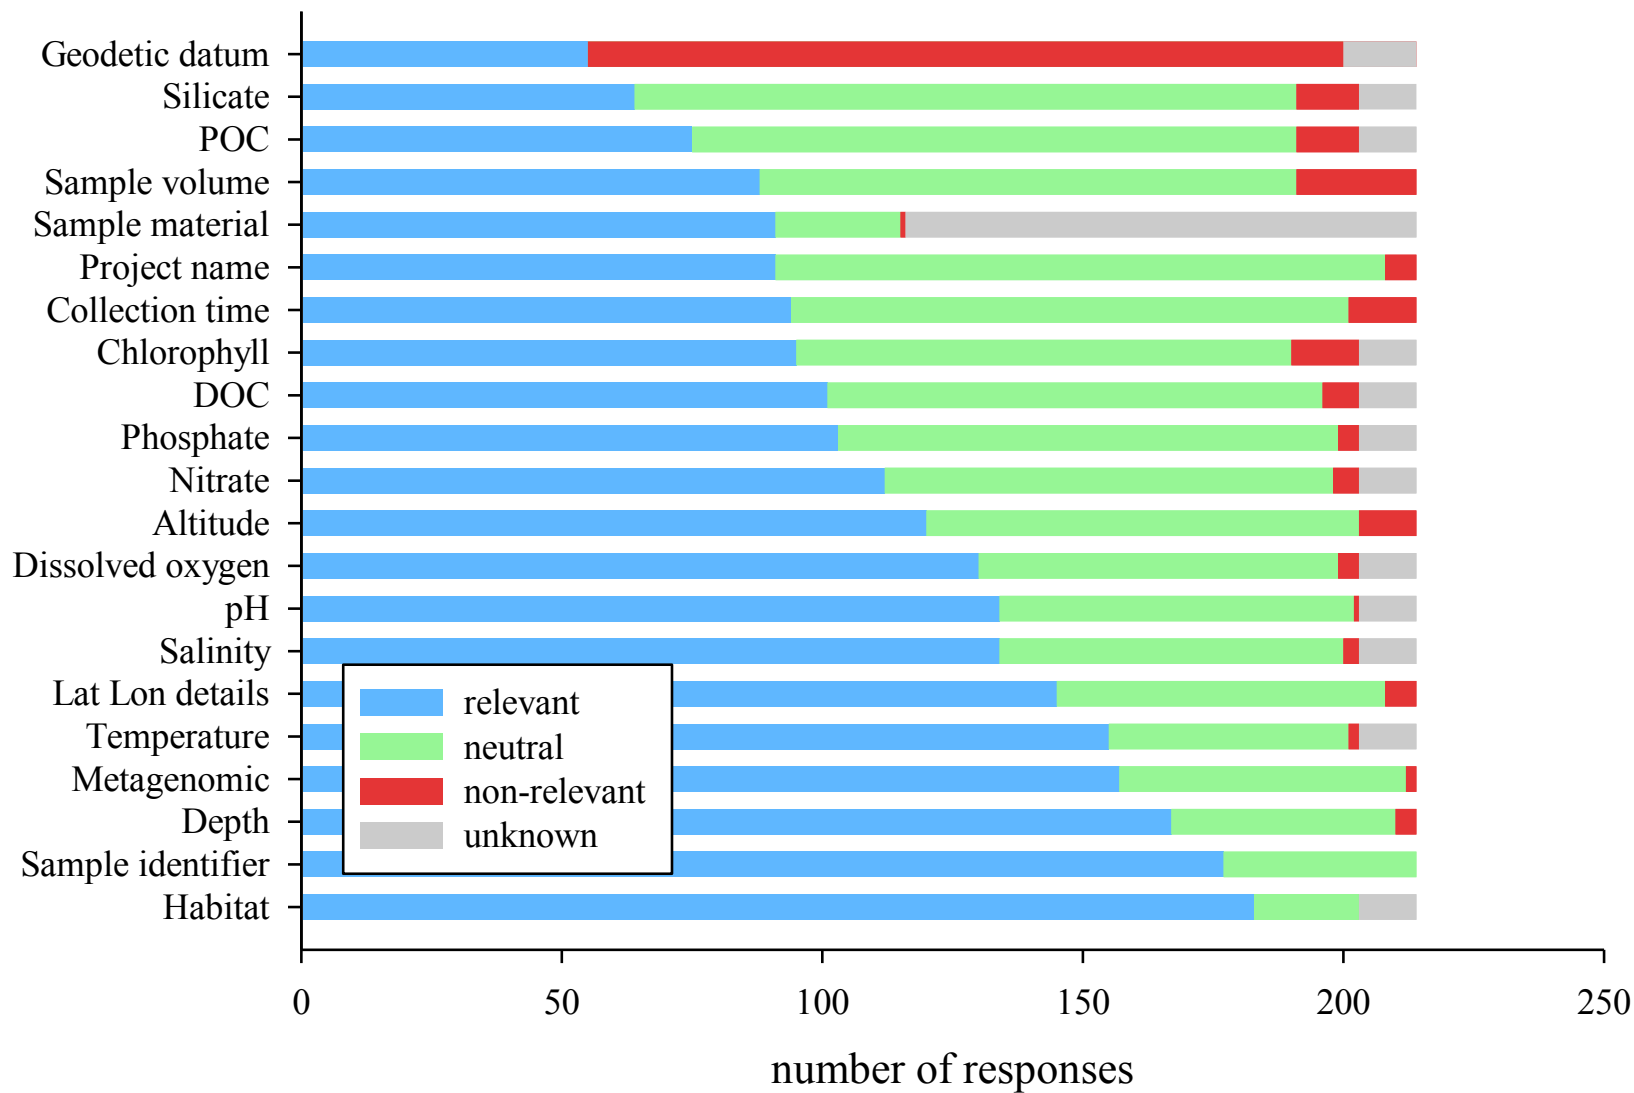

Nature Biotechnology | doi:10.1038/nbt.1823

**Figure S4.** SILVA contextual data survey results. Bars represent the absolute number of relevant (blue), neutral (green), non-relevant (red) and unknown (gray) responses for a given item. Number of relevant responses are indicated on the bars. The survey was from May to October 2008. 214 responses from 26 different countries were acquired within a six month period with 182 complete responses. The responses are classified as "relevant", "neutral", "non-relevant" and "unknown response" for each suggested field. "Unknown response" was added as a result of questions that were not answered.

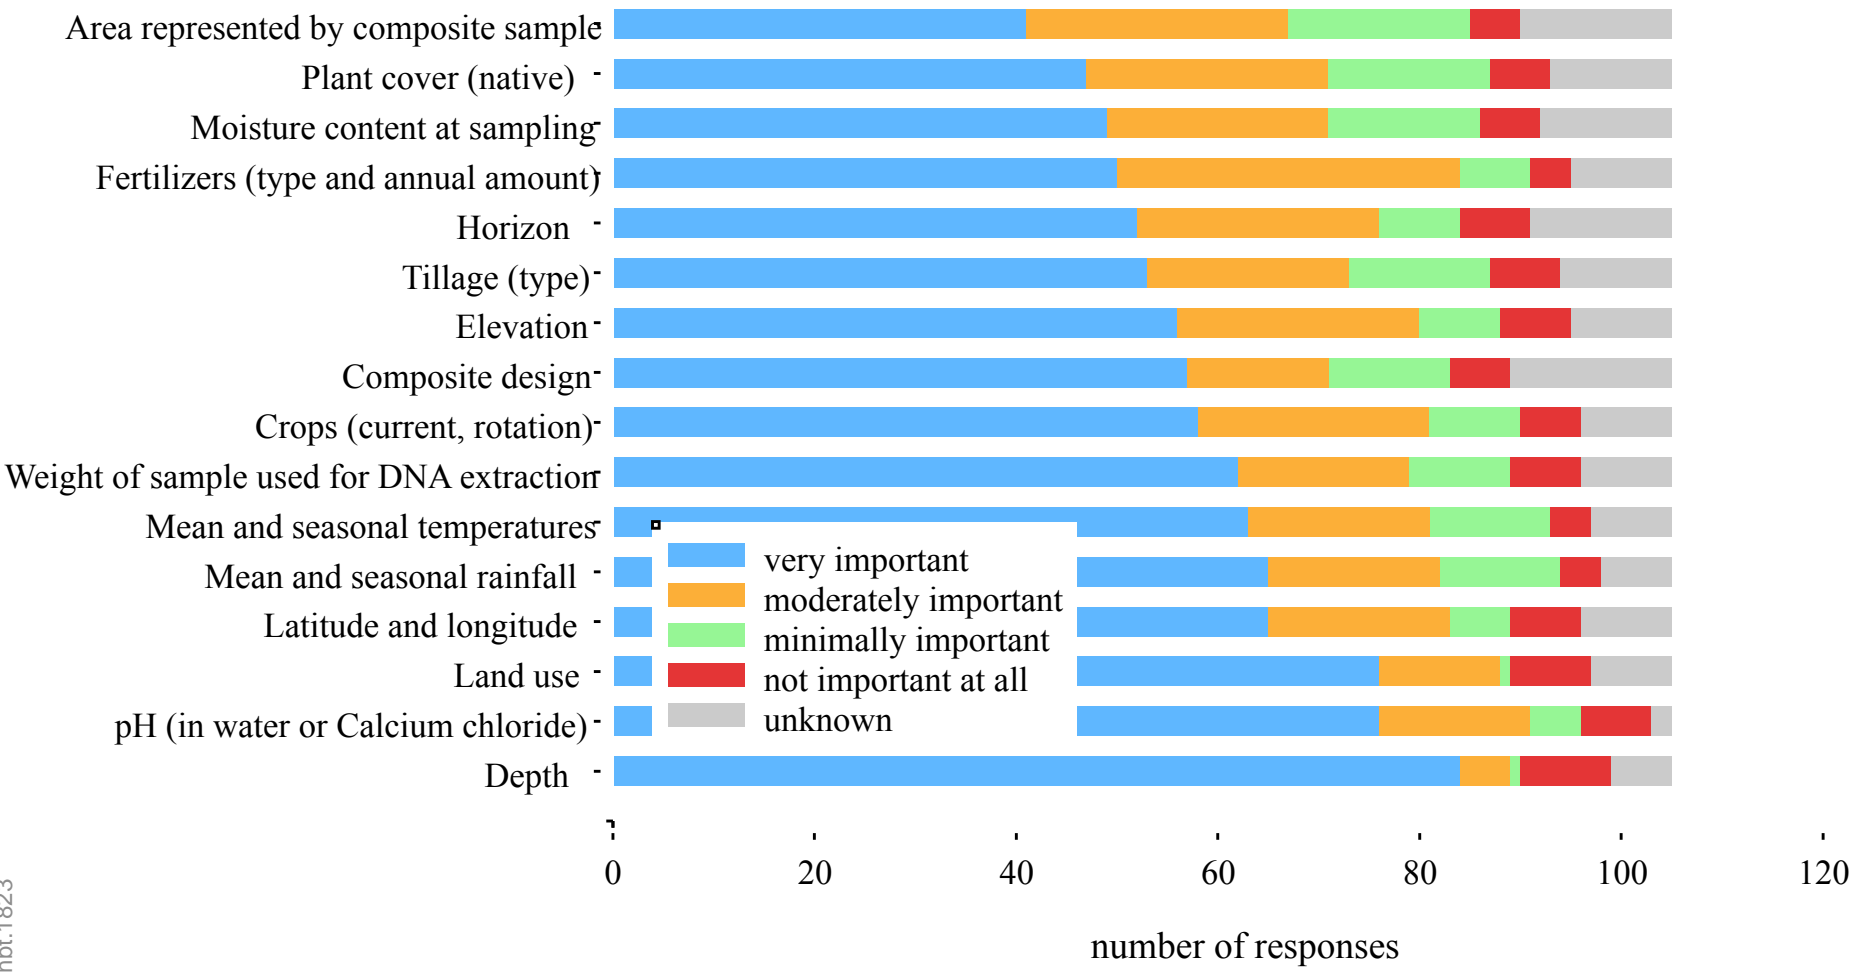

**Figure S5.** Soil metadata for microbial studies-importance survey results. Bars represent the absolute number of very important (blue), moderately important (orange), minimally important (green), not important at all (red) and unknown (gray) responses for a given item. The survey was ran between March 2009 and July 2009, and 105 unique IP responses were obtained. The survey items were grouped into seven categories as chemical, biological, geographical, physical, soil/geological, management and sampling. For each item, the respondent could rank the importance of each item and the difficulty of obtaining the particular field. For convenience the results displayed below are selected from items which ranked as being the most important and easiest to obtain.

Nature Biotechnology | www.nature.com/naturebiotechnology | 1038/nbt.1823

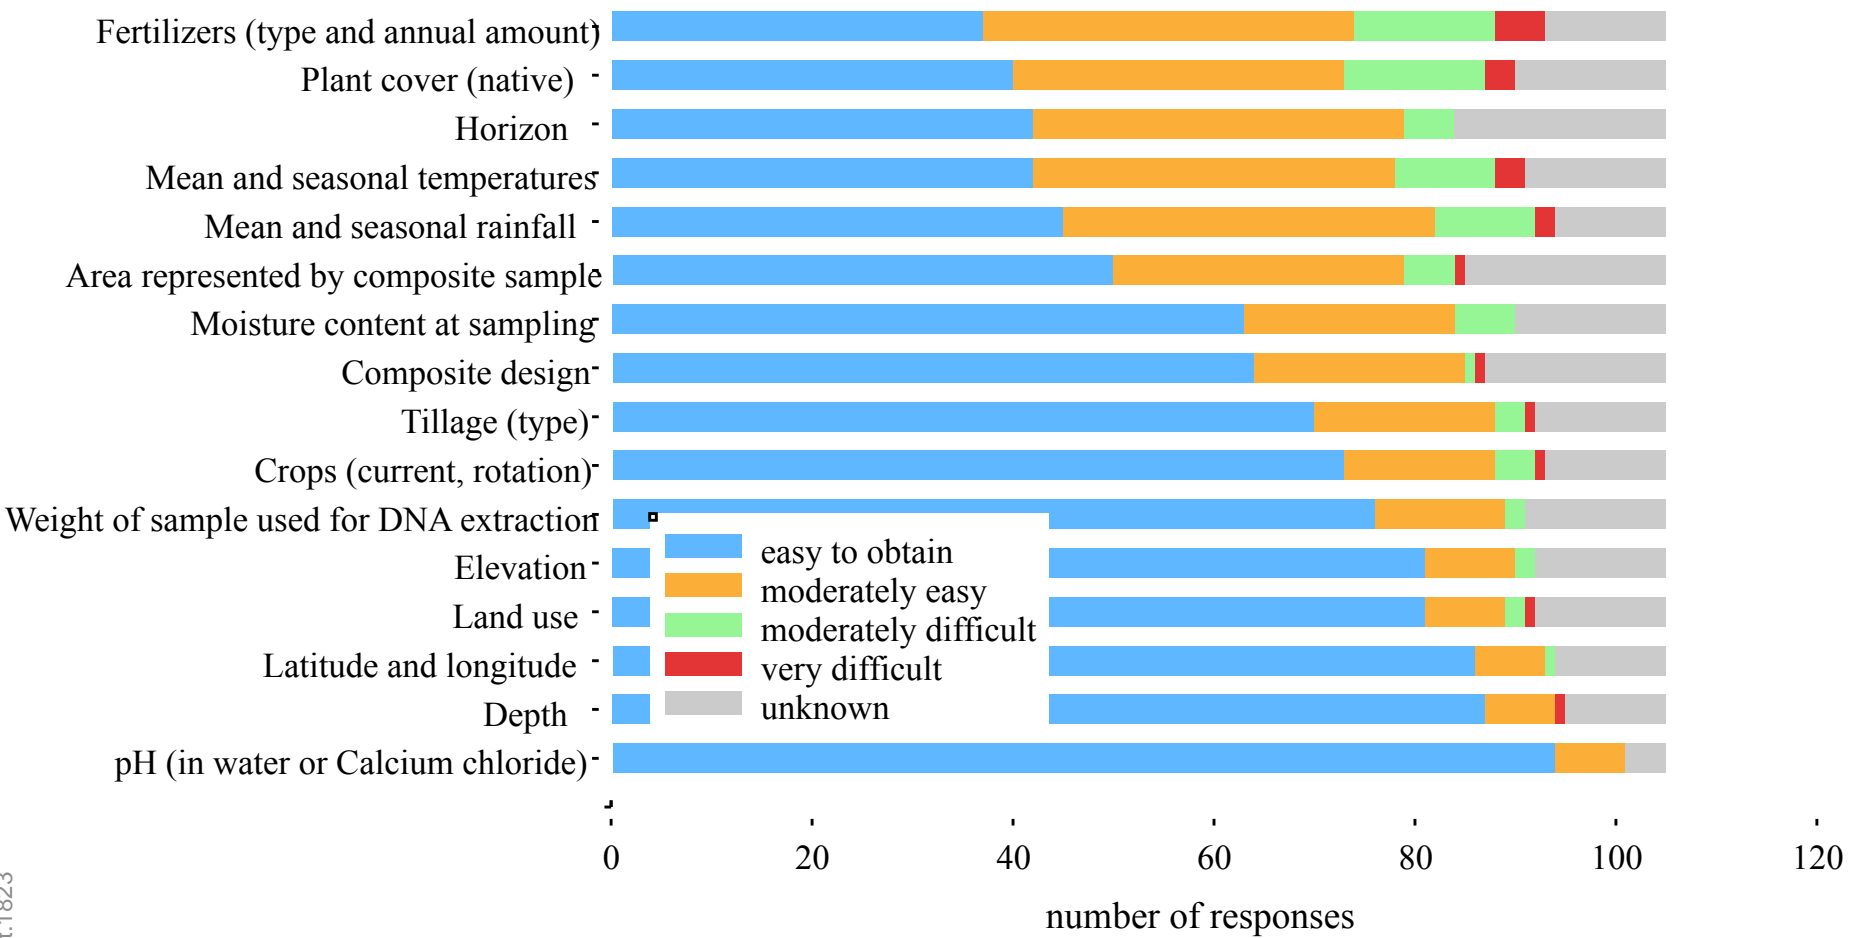

**Figure S6.** Soil metadata for microbial studies-difficulty survey results. Bars represent the absolute number of easy to obtain (blue), moderately easy (orange), moderately difficult (green), very difficult to obtain (red) and unknown (gray) responses for a given item. The survey was ran between March 2009 and July 2009, and 105 unique IP responses were obtained. The survey items were grouped into seven categories as chemical, biological, geographical, physical, soil/geological, management and sampling. For each item, the respondent could rank the importance of each item and the difficulty of obtaining the particular field. For convenience the results displayed below are selected from items which ranked as being the most important and easiest to obtain.

Nat. Microbiol. 2019, 9, 1038; doi:10.1038/nbt.1823

**Table S1.** List of publications, the respective digital object identifiers (DOI), high-level habitat term associated with the study, the number of sequences that have been submitted to the INSDC databases and the metadata fields reported in each publication. The publications were selected on the basis of the number of submitted sequences, but the selection was extended to cover studies from different habitats uniformly. ‘[ ]’ denotes concentration. The table is continued in the following pages.

| Title                                                                                                          | DOI                                     | Study Type                 | Number of sequences | Parameters                                                                                      |
|----------------------------------------------------------------------------------------------------------------|-----------------------------------------|----------------------------|---------------------|-------------------------------------------------------------------------------------------------|
| Pyrosequencing enumerates and contrasts soil microbial diversity                                               | doi:<br>10.1038/<br>ismej.<br>2007.53   | soil                       | 149159              | depth below surface<br>elevation<br>pH<br>soil type                                             |
| Evolution of mammals and their gut Microbes                                                                    | doi:<br>10.1126/<br>science.<br>1155725 | organism-associated (gut)  | 26160               | age<br>host species<br>diet<br>country                                                          |
| Assessment of bias associated with incomplete extraction of microbial DNA from soil                            | doi:<br>10.1128/<br>AEM.<br>00120-09    | soil                       | 21471               | depth below surface<br>pH<br>total organic carbon [ ]<br>particle classification (silt, clay %) |
| Molecular-phylogenetic characterization of microbial community imbalances in human inflammatory bowel diseases | doi:<br>10.1073/<br>pnas.<br>0706625104 | organism-associated (gut)  | 15172               | sample size (cm <sup>2</sup> )<br>disease status<br>sample preservation                         |
| Global diversity in the human salivary microbiome                                                              | doi:<br>10.1101/gr.<br>084616.108       | organism-associated (oral) | 14115               | age<br>country<br>sample size<br>sample preservation                                            |

|                                                                                                                     |                                                |                            |       |                                                                                                                                            |
|---------------------------------------------------------------------------------------------------------------------|------------------------------------------------|----------------------------|-------|--------------------------------------------------------------------------------------------------------------------------------------------|
| Towards the definition of a core of microorganisms involved in anaerobic digestion of sludge                        | doi:<br>10.1038/<br>ismej.<br>2009.2           | sludge                     | 12057 | reactor type<br>sewage type<br>temperature<br>sludge retention time<br>efficiency<br>industrial effluent %<br>1° treatment<br>2° treatment |
| Diversity of the human intestinal microbial flora                                                                   | doi:<br>10.1126/<br>science.<br>1110591        | organism-associated(gut)   | 11831 | age<br>medication<br>anatomical site<br>sample preservation<br>sampling procedure-biopsy                                                   |
| A core gut microbiome in obese and lean twins                                                                       | doi:<br>10.1038/<br>nature0754<br>0            | organism-associated(gut)   | 9773  | age<br>race/ethnicity<br>BMI<br>medication                                                                                                 |
| A diversity profile of the human skin microbiota                                                                    | doi:<br>10.1101/gr.<br>075549.10<br>7          | organism-associated (skin) | 6213  | age<br>sex<br>ethnicity<br>disease status<br>sample size<br>lab host strain                                                                |
| Changes in microbial community structure in the wake of hurricanes Katrina and Rita                                 | doi:<br>10.1021/<br>es801904z                  | lake/lacunial              | 5804  | sampling device<br>filter pore size<br>sample preservation                                                                                 |
| Reciprocal gut microbiota transplants from zebrafish and mice to germ-free recipients reveal host habitat selection | doi:<br>10.1016/<br>j.cell.<br>2006.08.04<br>3 | organism-associated (gut)  | 5534  | host strain/species<br>diet<br>host growth conditions                                                                                      |



|                                                                                                                                                                                                                            |                                                   |      |      |                                                                                                                                                                                                                                |
|----------------------------------------------------------------------------------------------------------------------------------------------------------------------------------------------------------------------------|---------------------------------------------------|------|------|--------------------------------------------------------------------------------------------------------------------------------------------------------------------------------------------------------------------------------|
| Short-term temporal variability in airborne bacterial and fungal populations                                                                                                                                               | doi:<br>10.1128/<br>AEM.<br>01467-07              | air  | 5196 | altitude<br>filter pore size<br>temperature<br>windspeed<br>wind direction<br>humidity<br>barometric pressure<br>solar irradiance                                                                                              |
| Extensive phylogenetic analysis of a soil bacterial community illustrates extreme taxon evenness and the effects of amplicon length, degree of coverage, and DNA fractionation on classification and ecological parameters | doi:<br>10.1128/<br>AEM.<br>01757-08              | soil | 4891 | dominant vegetation<br>soil type<br>sample processing                                                                                                                                                                          |
| Relative impacts of land-use, management intensity and fertilization upon soil microbial community structure in agricultural systems                                                                                       | doi:<br>10.1016/<br>j.soilbio.<br>2008.07.03<br>0 | soil | 3706 | soil type<br>dominant vegetation<br>sampling device<br>sample size<br>conductivity<br>total carbon [ ]<br>total nitrogen [ ]<br>particulate organic carbon [ ]<br>particulate organic nitrogen [ ]                             |
| Novelty and uniqueness patterns of rare members of the soil biosphere                                                                                                                                                      | doi:<br>10.1128/<br>AEM.<br>00410-08              | soil | 3663 | dominant vegetation<br>soil type<br>pH<br>NO <sub>3</sub> [ ]<br>SO <sub>3</sub> [ ]<br>HCO <sub>3</sub> <sup>-</sup> [ ]<br>Cl [ ]<br>Boron [ ]<br>Na [ ]<br>Ca [ ]<br>total organic matter [ ]<br>total organic nitrogen [ ] |

|                                                                                                                       |                                                      |                            |      |                                                                                                                  |
|-----------------------------------------------------------------------------------------------------------------------|------------------------------------------------------|----------------------------|------|------------------------------------------------------------------------------------------------------------------|
| Bacterial and fungal community structure in arctic tundra tussock and shrub soils                                     | doi:<br>10.1111/j.<br>1574-6941.<br>2006.0026<br>0.x | soil                       | 3338 | dominant vegetation<br>depth below surface<br>NH <sub>4</sub> [ ]<br>soil type<br>NO <sub>3</sub> [ ]<br>climate |
| Temporal and spatial variability in nearshore bacterioplankton communities of lake michigan                           | doi:<br>10.1111/j.<br>1574-6941.<br>2008.0063<br>9.x | lake/lacunal               | 2717 | temperature<br>conductivity<br>lake type<br>filter pore size                                                     |
| Microbes on mountainsides: contrasting elevational patterns of bacterial and plant diversity                          | doi:<br>10.1073/<br>pnas.<br>080192010<br>5          | soil                       | 2196 | altitude<br>soil horizon<br>temperature<br>total carbon [ ]<br>total nitrogen [ ]<br>pH<br>moisture              |
| Effects of host plant environment and ustilago maydis infection on the fungal endophyte community of maize (zea mays) | doi:<br>10.1111/j.<br>1469-8137.<br>2007.0235<br>0.x | organism-associated(plant) | 1576 | sampling host<br>strain<br>anatomical site                                                                       |
| Culturable aerobic bacteria from the upstream region of a karst water rivulet                                         | doi:<br>10.2436/20<br>.1501.01.4<br>8                | lake/lacunal               | 944  | pH<br>Ca [ ]<br>CO <sub>2</sub> [ ]<br>partial pressure                                                          |
| Novel root fungal consortium associated with a dominant desert grass                                                  | doi:<br>10.1128/<br>AEM.<br>02769-07                 | organism-associated(plant) | 657  | sampling host<br>anatomical site                                                                                 |

|                                                                                                                                                                  |                                             |                             |     |                                                                                                                                                                                                                                                                                           |
|------------------------------------------------------------------------------------------------------------------------------------------------------------------|---------------------------------------------|-----------------------------|-----|-------------------------------------------------------------------------------------------------------------------------------------------------------------------------------------------------------------------------------------------------------------------------------------------|
| Biogeochemistry and community composition of iron- and sulfur-precipitating microbial mats at the chefren mud volcano (nile deep sea fan, eastern mediterranean) | doi:<br>10.1128/<br>AEM.<br>01751-07        | microbial mat/mud volcano   | 520 | CH <sub>4</sub> [ ]<br>SO <sub>4</sub> [ ]<br>organic carbon [ ]<br>Na, Cl [ ]<br>Fe <sup>+2/+3</sup> [ ]<br>H <sub>2</sub> S [ ]                                                                                                                                                         |
| Spatial and temporal patterns in the microbial diversity of a meromictic soda lake in washington state                                                           | doi:<br>10.1128/<br>AEM.<br>00455-08        | lake/lacunial               | 508 | lake type<br>salinity<br>pH<br>depth below surface<br>dissolved O <sub>2</sub> [ ]<br>dissolved organic carbon [ ]<br>total nitrogen [ ]<br>NO <sub>3</sub> [ ]<br>NO <sub>2</sub> [ ]<br>PO <sub>4</sub> [ ]<br>total organic carbon [ ]<br>H <sub>2</sub> S [ ]<br>total phosphorus [ ] |
| Active root-inhabiting microbes identified by rapid incorporation of plant-derived carbon into RNA                                                               | doi:<br>10.1073/<br>pnas.<br>070590210<br>4 | organism-associated (plant) | 467 | anatomical site<br>dominant vegetation                                                                                                                                                                                                                                                    |
| Changes in bacterial and archaeal community structure and functional diversity along a geochemically variable soil profile                                       | doi:<br>10.1128/<br>AEM.<br>01787-07        | soil                        | 460 | soil type<br>soil horizon<br>pH<br>particle size<br>moisture<br>organic carbon [ ]<br>total nitrogen [ ]<br>total carbon [ ]                                                                                                                                                              |

|                                                                                                                                                           |                                                      |                   |     |                                                                                                                                                                                                                          |
|-----------------------------------------------------------------------------------------------------------------------------------------------------------|------------------------------------------------------|-------------------|-----|--------------------------------------------------------------------------------------------------------------------------------------------------------------------------------------------------------------------------|
| Species richness and phylogenetic diversity comparisons of soil microbial communities affected by nickel-mining and revegetation efforts in new Caledonia | doi:<br>10.1016/<br>j.ejsobi.<br>2006.12.00<br>1     | soil              | 435 | dominant vegetation<br>soil horizon<br>depth below surface<br>sieve pore size<br>total carbon [ ]<br>total nitrogen [ ]                                                                                                  |
| Microbial community succession in an unvegetated, recently deglaciated soil                                                                               | doi:<br>10.1007/<br>s00248-006<br>-9144-7            | soil              | 411 | elevation<br>soil type<br>rock type<br>dominant vegetation<br>depth below surface<br>sieve pore size<br>total nitrogen [ ]<br>total carbon [ ]<br>pH<br>labile phosphorus content                                        |
| The influence of ultramafic rocks on microbial communities at the Logatchev hydrothermal field, located 15N on the Mid-Atlantic ridge                     | doi:<br>10.1111/j.<br>1574-6941.<br>2007.0032<br>5.x | hydrothermal vent | 354 | sample material<br>filter pore size<br>temperature<br>pH<br>H <sub>2</sub> S [ ]<br>CH <sub>4</sub> [ ]<br>dissolved H <sub>2</sub> [ ]                                                                                  |
| An oligarchic microbial assemblage in the anoxic bottom waters of a volcanic subglacial lake                                                              | doi:<br>10.1038/<br>ismej.<br>2008.124               | lake/lacunal      | 334 | temperature<br>pH<br>trophic status<br>particulate organic carbon [ ]<br>total dissolved solids [ ]<br>sample size<br>depth below surface<br>dissolved O <sub>2</sub> [ ]<br>SO <sub>4</sub> [ ]<br>H <sub>2</sub> S [ ] |

|                                                                                                                                                       |                                                        |                                         |     |                                                                                                                                                                                                                    |
|-------------------------------------------------------------------------------------------------------------------------------------------------------|--------------------------------------------------------|-----------------------------------------|-----|--------------------------------------------------------------------------------------------------------------------------------------------------------------------------------------------------------------------|
| Diversity and ubiquity of thermophilic methanogenic archaea in temperate anoxic soils                                                                 | doi:<br>10.1111/j.<br>1462-2920.<br>2005.0090<br>4.x   | soil                                    | 323 | soil type<br>dominant vegetation<br>country<br>depth below surface                                                                                                                                                 |
| Comparative analysis of bacterial diversity in freshwater sediment of a shallow eutrophic lake by molecular and improved cultivation-based techniques | doi:<br>10.1128/<br>AEM.<br>71.4.2162-<br>2169.2005    | sediment (lake/lacunal)                 | 322 | temperature<br>pH<br>dissolved O <sub>2</sub> [ ]<br>turbidity<br>trophic status<br>depth below surface<br>water content<br>pH<br>total carbon [ ]<br>total nitrogen [ ]<br>particle classification (silt, clay %) |
| Bacterial diversity in a subseafloor habitat following a deep-sea volcanic eruption                                                                   | doi:<br>10.1111/j.<br>1574-6941.<br>2003.tb010<br>80.x | sediment (marine/<br>hydrothermal vent) | 287 | filter pore size<br>temperature<br>pH<br>H <sub>2</sub> S [ ]<br>Mg [ ]<br>Cl [ ]<br>Si [ ]<br>Fe <sup>+2/+3</sup> [ ]<br>salinity                                                                                 |

|                                                                                                                                                                                  |                                                  |                           |            |                                                                                                                                                                                                                                                                                                                        |
|----------------------------------------------------------------------------------------------------------------------------------------------------------------------------------|--------------------------------------------------|---------------------------|------------|------------------------------------------------------------------------------------------------------------------------------------------------------------------------------------------------------------------------------------------------------------------------------------------------------------------------|
| <p>Comparison of deep-sea sediment microbial communities in the Eastern Mediterranean</p>                                                                                        | <p>doi:<br/>10.1111/j.1574-6941.2008.00463.x</p> | <p>sediment (marine)</p>  | <p>200</p> | <p>core size<br/>depth below surface<br/>water content<br/>density<br/>total nitrogen [ ]<br/>total carbon [ ]<br/>pH<br/>total organic carbon [ ]<br/>NH<sub>4</sub> [ ]<br/>NO<sub>2</sub> [ ]<br/>NO<sub>3</sub> [ ]<br/>SO<sub>4</sub> [ ]<br/>S<sup>-2</sup> [ ]<br/>PO<sub>4</sub> [ ]<br/>Br [ ]<br/>Cl [ ]</p> |
| <p>Comparison of microbial communities associated with phase-separation-induced hydrothermal fluids at the Yonaguni Knoll IV hydrothermal field, the Southern Okinawa Trough</p> | <p>doi:<br/>10.1111/j.1574-6941.2008.00636.x</p> | <p>hydrothermal field</p> | <p>140</p> | <p>sample material<br/>temperature<br/>H<sub>2</sub> [ ]<br/>CH<sub>4</sub> [ ]<br/>CO<sub>2</sub> [ ]<br/>Cl [ ]</p>                                                                                                                                                                                                  |
| <p>Variability in microbial community and venting chemistry in a sediment-hosted backarc hydrothermal system: Impacts of seafloor phase-separation</p>                           | <p>doi:<br/>10.1016/j.femsec.2005.03.007</p>     | <p>hydrothermal vent</p>  | <p>112</p> | <p>temperature<br/>pH<br/>H<sub>2</sub>S [ ]<br/>Mg [ ]<br/>Cl [ ]<br/>Si [ ]<br/>K [ ]<br/>Ca [ ]</p>                                                                                                                                                                                                                 |
| <p>Temporal and spatial archaeal colonization of hydrothermal vent deposits</p>                                                                                                  | <p>doi:<br/>10.1111/j.1462-2920.2007.01505.x</p> | <p>hydrothermal vent</p>  | <p>89</p>  | <p>sample material<br/>temperature</p>                                                                                                                                                                                                                                                                                 |

**Table S2.** Metadata field statistics from SILVA Parc small subunit (ssu) rRNA databases. The numbers are absolute for each item, and "-" denotes that the item has not been parsed for a release. The parsed metadata is obtained from source feature key qualifiers and other feature keys from EMBL with each release. The total number of sequences in the parc ssu databases are 422987, 461823, 504295, 566047, 606879, 682303, 756668, 868390, and 995747 from release 90 through 100, respectively. The table is continued in the following pages.

|                       | <b>alternative name</b> | <b>biomaterial</b> | <b>clone</b> | <b>clone library</b> | <b>collection date</b> | <b>collector</b> | <b>country</b> | <b>culture collection</b> |
|-----------------------|-------------------------|--------------------|--------------|----------------------|------------------------|------------------|----------------|---------------------------|
| <b>silva_r90_ssu</b>  | 885                     | -                  | 273685       | -                    | 18303                  | 7379             | 118711         | -                         |
| <b>silva_r91_ssu</b>  | 926                     | -                  | 303016       | -                    | 23234                  | 8333             | 135901         | -                         |
| <b>silva_r92_ssu</b>  | 966                     | -                  | 337132       | -                    | 33907                  | 14142            | 160048         | -                         |
| <b>silva_r93_ssu</b>  | 1090                    | 0                  | 382364       | -                    | 42192                  | 21065            | 187480         | -                         |
| <b>silva_r94_ssu</b>  | 1152                    | 0                  | 413190       | -                    | 51514                  | 25948            | 211498         | -                         |
| <b>silva_r95_ssu</b>  | 1356                    | 0                  | 477631       | 20474                | 57329                  | 28932            | 245783         | -                         |
| <b>silva_r96_ssu</b>  | 1368                    | 0                  | 539395       | 22977                | 81066                  | 35033            | 282935         | -                         |
| <b>silva_r98_ssu</b>  | 1613                    | 0                  | 629885       | 26227                | 94024                  | 39208            | 326341         | -                         |
| <b>silva_r100_ssu</b> | 2169                    | 0                  | 693317       | 34091                | 111891                 | 57760            | 486501         | 1651                      |

|                       | <b>description</b> | <b>haplotype</b> | <b>habitat</b> | <b>identified by</b> | <b>isolate</b> | <b>isolation source</b> | <b>lab host</b> | <b>latlong</b> |
|-----------------------|--------------------|------------------|----------------|----------------------|----------------|-------------------------|-----------------|----------------|
| <b>silva_r90_ssu</b>  | 422987             | -                | -              | -                    | 45870          | 280919                  | -               | 15835          |
| <b>silva_r91_ssu</b>  | 461823             | -                | -              | -                    | 49446          | 314661                  | -               | 17954          |
| <b>silva_r92_ssu</b>  | 504295             | -                | -              | -                    | 52022          | 351415                  | -               | 27456          |
| <b>silva_r93_ssu</b>  | 566047             | -                | -              | -                    | 54976          | 404797                  | -               | 39446          |
| <b>silva_r94_ssu</b>  | 606879             | -                | -              | -                    | 58472          | 440066                  | -               | 46139          |
| <b>silva_r95_ssu</b>  | 682303             | -                | -              | -                    | 61407          | 511139                  | -               | 50191          |
| <b>silva_r96_ssu</b>  | 756668             | -                | -              | -                    | 65576          | 579739                  | -               | 63577          |
| <b>silva_r98_ssu</b>  | 868390             | -                | -              | -                    | 69612          | 676049                  | -               | 72084          |
| <b>silva_r100_ssu</b> | 995747             | 448              | 8699           | 11386                | 72320          | 936127                  | 995             | 94337          |



|                       | molecule type | organelle | organism name | pcr primers | plasmid name | specific host | strain | subspecies |
|-----------------------|---------------|-----------|---------------|-------------|--------------|---------------|--------|------------|
| <b>silva_r90_ssu</b>  | 422987        | 5336      | 422987        | -           | -            | 47009         | 83107  | -          |
| <b>silva_r91_ssu</b>  | 461823        | 5594      | 461823        | -           | -            | 53129         | 87690  | -          |
| <b>silva_r92_ssu</b>  | 504295        | 5613      | 504295        | -           | -            | 57339         | 93891  | -          |
| <b>silva_r93_ssu</b>  | 566047        | 5975      | 566047        | 0           | -            | 76534         | 103499 | -          |
| <b>silva_r94_ssu</b>  | 606879        | 6010      | 606879        | 0           | -            | 80904         | 109149 | -          |
| <b>silva_r95_ssu</b>  | 682303        | 6338      | 682303        | 0           | -            | 110662        | 116464 | -          |
| <b>silva_r96_ssu</b>  | 756668        | 6580      | 756668        | 0           | -            | 136667        | 124204 | -          |
| <b>silva_r98_ssu</b>  | 868390        | 8846      | 868390        | 0           | -            | -             | 137399 | -          |
| <b>silva_r100_ssu</b> | 995747        | 10380     | 995747        | 0           | 75           | 235618        | 161578 | 5478       |
